# Supplementary material for: HIV-Specific CD8+ T Cells Exhibit Reduced and Differentially Regulated Cytolytic Activity in Lymphoid Tissue
Source: PubMed Central journal article supplement — Cell Rep. Author manuscript; Available in PMC 2018 Jan 11. (PMC5764192; doi:10.1016/j.celrep.2017.11.075), 2017-12-19
Supplement: NIHMS927648-supplement-1.pdf [file NIHMS927648-supplement-1.pdf]

## Supplemental Experimental Methods.

### Tissue sources

Recruitment occurred at four sites: INER-CIENI in Mexico City, Mexico (peripheral blood and cervical LN); Case Western Reserve University in Cleveland, Ohio (mesenteric LN); the University of Pennsylvania CFAR Human Immunology Core Facility (peripheral blood); and the Pathology Department, University General Hospital of Heraklion, Crete, Greece (mesenteric LN).

### Cells and tissues

Peripheral blood mononuclear cells (PBMC) were purified from whole blood or leukapheresis products by Ficoll-Hypaque density gradient centrifugation. Lymph node mononuclear cells (LNMC) were isolated by mechanical disruption, performed either manually or using a gentleMACS tissue dissociator (C tubes, program h\_tumor\_01\_01, Miltenyi Biotec). PBMC and LNMC were cryopreserved and stored at -140°C. All cryopreserved cells were thawed and rested overnight in complete medium (RPMI-1640, 10% heat-inactivated fetal bovine serum, 1% penicillin, 1% µg/ml streptomycin, and 1% L-glutamine) prior to immunostaining or stimulation. Whole LN tissue samples were fixed in formalin and paraffin-embedded prior to sectioning.

### Antibodies and MHC tetramers

The following antibodies were used for flow cytometry: (1) pre-stain antibodies:  $\alpha$ -CCR7 BV711 (clone G043H7, BioLegend),  $\alpha$ -CCR7 APC-eFluor780 (clone 3D12, eBioscience), and  $\alpha$ -CCR7 APC-Cy7 (clone G043H7, BioLegend); (2) surface stain antibodies:  $\alpha$ -CD14 PE-Cy5 (clone 61D3, Abcam),  $\alpha$ -CD14 APC-Cy7 (clone M $\phi$ P9, BD Biosciences),  $\alpha$ -CD14 BV510 (clone M5E2, BioLegend),  $\alpha$ -CD16 PE-Cy5 or APC-Cy7 (clone 3G8, BioLegend or BD Biosciences, respectively),  $\alpha$ -CD19 PE-Cy5, BV510 or BV785 (clone HIB19, BioLegend),  $\alpha$ -CD4 PE-Cy5.5 (clone S3.5, Invitrogen),  $\alpha$ -CD8a BV570, BV605 or BV650 (clone RPA-T8, BioLegend),  $\alpha$ -CD8 QD605 (clone 3B5, Invitrogen),  $\alpha$ -CD27 BV650 or BV785 (clone O323, BioLegend),  $\alpha$ -CD27 QD655 (clone CLB-27/1, Invitrogen),  $\alpha$ -CD45RO ECD (clone UCHL1, Beckman Coulter),  $\alpha$ -CD45RO PE-BV650 (clone UCHL1, BD Biosciences),  $\alpha$ -CXCR5 AlexaFluor488 (clone RF8B2, BD Biosciences),  $\alpha$ -CXCR5 PE-Cy7 (clone J252D4, BioLegend),  $\alpha$ -PD-1 APC-Cy7 or BV785 (clone EH12.2H7, BioLegend), and  $\alpha$ -CXCR3 BV711 (clone G025H7, BioLegend); (3) intracellular stain antibodies:  $\alpha$ -CD3 BV570 or BV711 (clone UCHT1, BioLegend),  $\alpha$ -IFN $\gamma$  AlexaFluor700 (clone B27, Invitrogen),  $\alpha$ -TNF PE-Cy7 (clone MAb11, BD Biosciences),  $\alpha$ -perforin BV421 (clone B-D48, BioLegend),  $\alpha$ -perforin PE-Cy7 (clone dG9, eBioscience),  $\alpha$ -granzyme B AlexaFluor700 (clone GB11, BD Biosciences),  $\alpha$ -T-bet PE (clone 4B10, eBioscience),  $\alpha$ -T-bet PE-Dazzle 594 (clone 4B10, BioLegend),  $\alpha$ -eomes eFluor660 or AlexaFluor647 (clone WD1928, eBioscience),  $\alpha$ -CD69 PE-Cy5 (clone FN50, BD Biosciences), and  $\alpha$ -Ki67 FITC (clone B56, BD Biosciences).

MHC-class I tetramers conjugated to PE or BV421 were used to detect CD8<sup>+</sup> T-cells specific for SLYNTVATL (SL9)/HLA-A\*0201, ILKEPVHGV (IV9)/HLA-A\*0201, FLGKIWPSHK (FK10)/HLA-A\*0201, RYPLTFGW (RW8)/HLA-A\*2402, KYKCLKHIVW (KW9) HLA-A\*2402, GPGHKARVL (GL9)/HLA-B\*0702, HPRVSSEVHI (HI10)/HLA-B\*0702, and SPAIFQSSF (SM10)/HLA-B\*0702.

The following antibodies and reagents were used for immunohistochemistry studies: Directly conjugated  $\alpha$ -CD20 eFluor615 (clone L26, eBiosciences) and  $\alpha$ -perforin AlexaFluor647 (clone dG9, BioLegend) antibodies were used in combination with non-conjugated  $\alpha$ -granzyme B (clone GrB-7, Dako) and  $\alpha$ -CD8 (clone 4B11, Thermo Scientific). GzmB was visualized with  $\alpha$ -mouse IgG2a AlexaFluor488 (Life Technologies), and CD8 was visualized with  $\alpha$ -mouse IgG2b AlexaFluor546 (Life Technologies). JoJo-1 (Invitrogen), which binds nucleic acids, was used for nuclear staining.

### Redirected killing assay

PBMC and Tonsil cells were thawed and rested overnight. Next day, effector cells (CD8<sup>+</sup> T cells) were purified using a CD8<sup>+</sup> T cell enrichment (negative selection) kit (Stemcell) for both tonsil cells and PBMCs. Tonsil cells went through further positive and negative isolation of CXCR5<sup>+</sup> cells using column separation (Miltenyi). The different CD8<sup>+</sup> T cell populations were then rested for 2 hr at 37°C.

Target (P815) cells were split 2 times and stained in PBS for cell tracing with TFL4 (1:3000, OncoImmunin) and detection of dead cells with LIVE/DEAD ViVid (1:2000, Invitrogen) prior to killing assay for 15 min at 37C. P815 cells were washed two times with PBS and incubated with  $\alpha$ -CD3 (BioRad) for 30 min in dark. Target cells by themselves, or effector and target cells were co-cultured at a 1:1, 5:1 and 1:10 ratio, quickly spun down for 30 secs to pack cells, and co-incubated for 4hr at 37C in complete R10 media. Cells were then perm/fixd (BD Biosciences) and stained with active-caspase 3 FITC (BD Biosciences). Cell were then fixed and run a LSR II. Background was reduced by using LIVE/DEAD ViVid to gate out cells dead by the start of the assay. To correct for spontaneous apoptosis, all effector:target ratio killing replicates were background subtracted based on the frequency of caspase-3+ target cells in the wells with only target cells. To detect the level of redirected killing of target cells, cells were gated the following way: single cells-LIVE P815 cells-caspase-3+ (level of killing after background subtraction).

#### **TGF- $\beta$ /IL-12 induction of CXCR5 expression**

Proliferation assays, as described in Materials and Methods, were performed with tonsillar mononuclear cells (n=3) labelled with CellTrace CFSE (Molecular Probes, Invitrogen). Cells were stimulated with 1 $\mu$ g/ml SEB (Sigma) for 5 days in the presence of plate-bound anti-CD28/CD49d (BD Biosciences) and recombinant human TGF- $\beta$ 1 (5ng/ml, R&D Systems) and/or IL-12 (1ng/ml, R&D Systems).

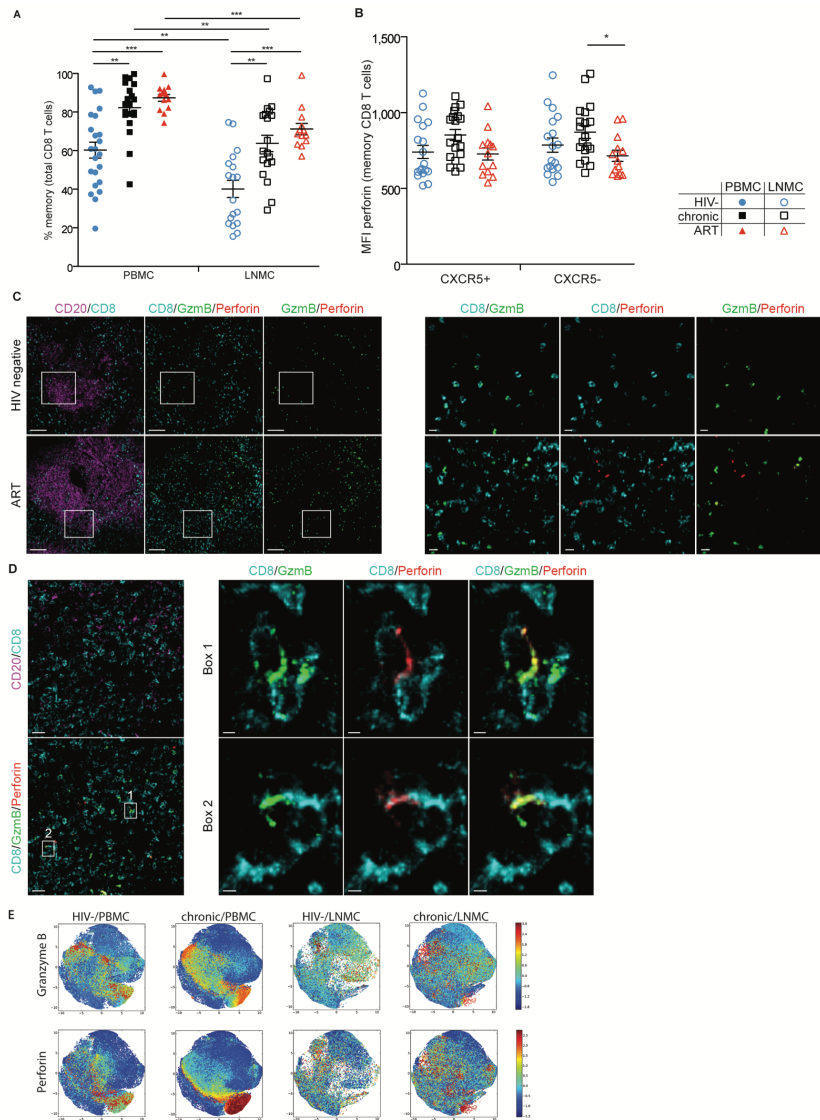

**Figure S1.** Memory phenotype and perforin/gzmB expression patterns in follicular and extrafollicular CD8<sup>+</sup> T-cells. Relate to Figures 1 and 2. **(A)** Memory phenotype analysis of CD8<sup>+</sup> T-cells in PBMC and LNMC based on CD27 and CD45RO expression patterns. Data shown represent cells that do not express a naïve phenotype (CD27<sup>+</sup> CD45RO<sup>-</sup>). HIV<sup>-</sup> (●, ○), HIV<sup>+</sup> therapy-naïve (■, □), HIV<sup>+</sup> on ART (▲, △). **(B)** Perforin MFI in CXCR5<sup>+</sup> and CXCR5<sup>-</sup> memory CD8<sup>+</sup> T-cells in LNMC. Statistical significance between subject groups within a memory subset was determined by using the Kruskal-Wallis test with Dunn's post-test. Statistical significance within a subject group between memory subsets was determined by using the Mann-Whitney two-tailed test. For both tests: \* =  $P < 0.05$ ; \*\* =  $P < 0.01$ ; \*\*\* =  $P < 0.001$ . Ranges shown on plots represent mean  $\pm$  SEM. HIV<sup>-</sup> (●, ○), HIV<sup>+</sup> therapy-naïve (■, □), HIV<sup>+</sup> on ART (▲, △). **(C)** Immunohistochemistry staining of paraffin-embedded tissue sections showing CD8<sup>+</sup> T-cells within B-cell follicles. Top row: low magnification view of a representative B-cell follicle from an HIV<sup>-</sup> individual (scale bar = 100  $\mu$ m). Boxes highlights areas for 10x zoom in right images (scale bar = 10  $\mu$ m). Bottom row: corresponding data from an ART-treated HIV<sup>+</sup> individual. **(D)** Immunohistochemistry staining of a paraffin-embedded tissue section showing a representative image of perforin and gzmB expression in CD8<sup>+</sup> T-cells at the border between the T-cell zone and a B-cell follicle from an HIV<sup>+</sup> subject on ART. Left: scale bar = 20  $\mu$ m. Boxes 1 and 2 indicate areas for 10x zoom in right images (scale bar = 200  $\mu$ m). **(E)** Cell ACCENSE tSNE plots of perforin and gzmB expression in memory CD8<sup>+</sup> T-cells comparing PBMC vs. LNMC from HIV<sup>-</sup> and untreated HIV<sup>+</sup> individuals (based on  $n=4$ /group).

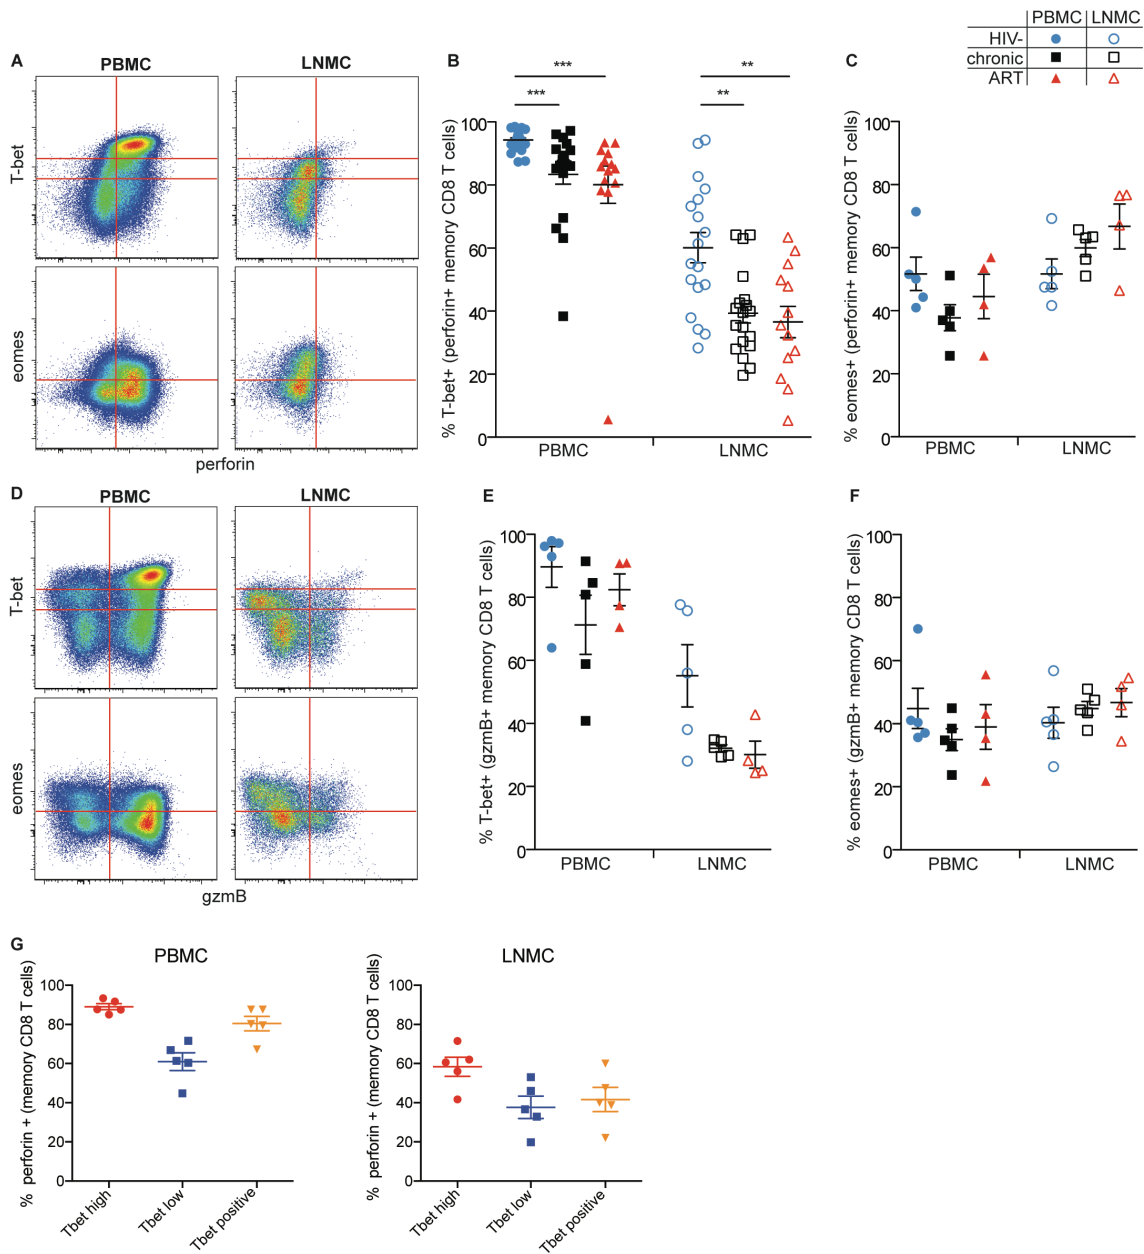

**Figure S2.** Cytolytic protein expression in CD8<sup>+</sup> T-cells is disconnected from classically associated transcription factors in LN. Related to Figures 2 and 3. **(A)** Representative flow cytometry plots showing memory CD8<sup>+</sup> T-cell expression of perforin vs. T-bet and eomes in PBMC and LNMC from an ART-treated HIV<sup>+</sup> individual. **(B)** Frequency of T-bet co-expression in perforin<sup>+</sup> memory CD8<sup>+</sup> T-cells in PBMC vs. LNMC. **(C)** Frequency of eomes co-expression in perforin<sup>+</sup> memory CD8<sup>+</sup> T-cells in PBMC vs. LNMC. **(D)** Representative flow cytometry plots showing memory CD8<sup>+</sup> T-cell expression of gzmB vs. T-bet and eomes in PBMC and LNMC from an ART-treated HIV<sup>+</sup> individual. **(E)** Frequency of T-bet co-expression in gzmB<sup>+</sup> memory CD8<sup>+</sup> T-cells in PBMC vs. LNMC. **(F)** Frequency of eomes co-expression in gzmB<sup>+</sup> memory CD8<sup>+</sup> T-cells in PBMC vs. LNMC. **(G)** Frequency of Tbet-expressing memory CD8<sup>+</sup> T cells that express perforin depending on the differential levels of Tbet expression. Data show five selected individuals matched PBMC and LNMC randomly selected from the sample cohort. **(B-C, E-F)** Statistical significance between subject groups within a tissue compartment was determined by using the Kruskal-Wallis test with Dunn's post-test. \* =  $P < 0.05$ ; \*\* =  $P < 0.01$ ; \*\*\* =  $P < 0.001$ . HIV<sup>-</sup> (●, ○), HIV<sup>+</sup> therapy-naïve (■, □), HIV<sup>+</sup> on ART (▲, △). Ranges shown on plots represent mean  $\pm$  SEM.

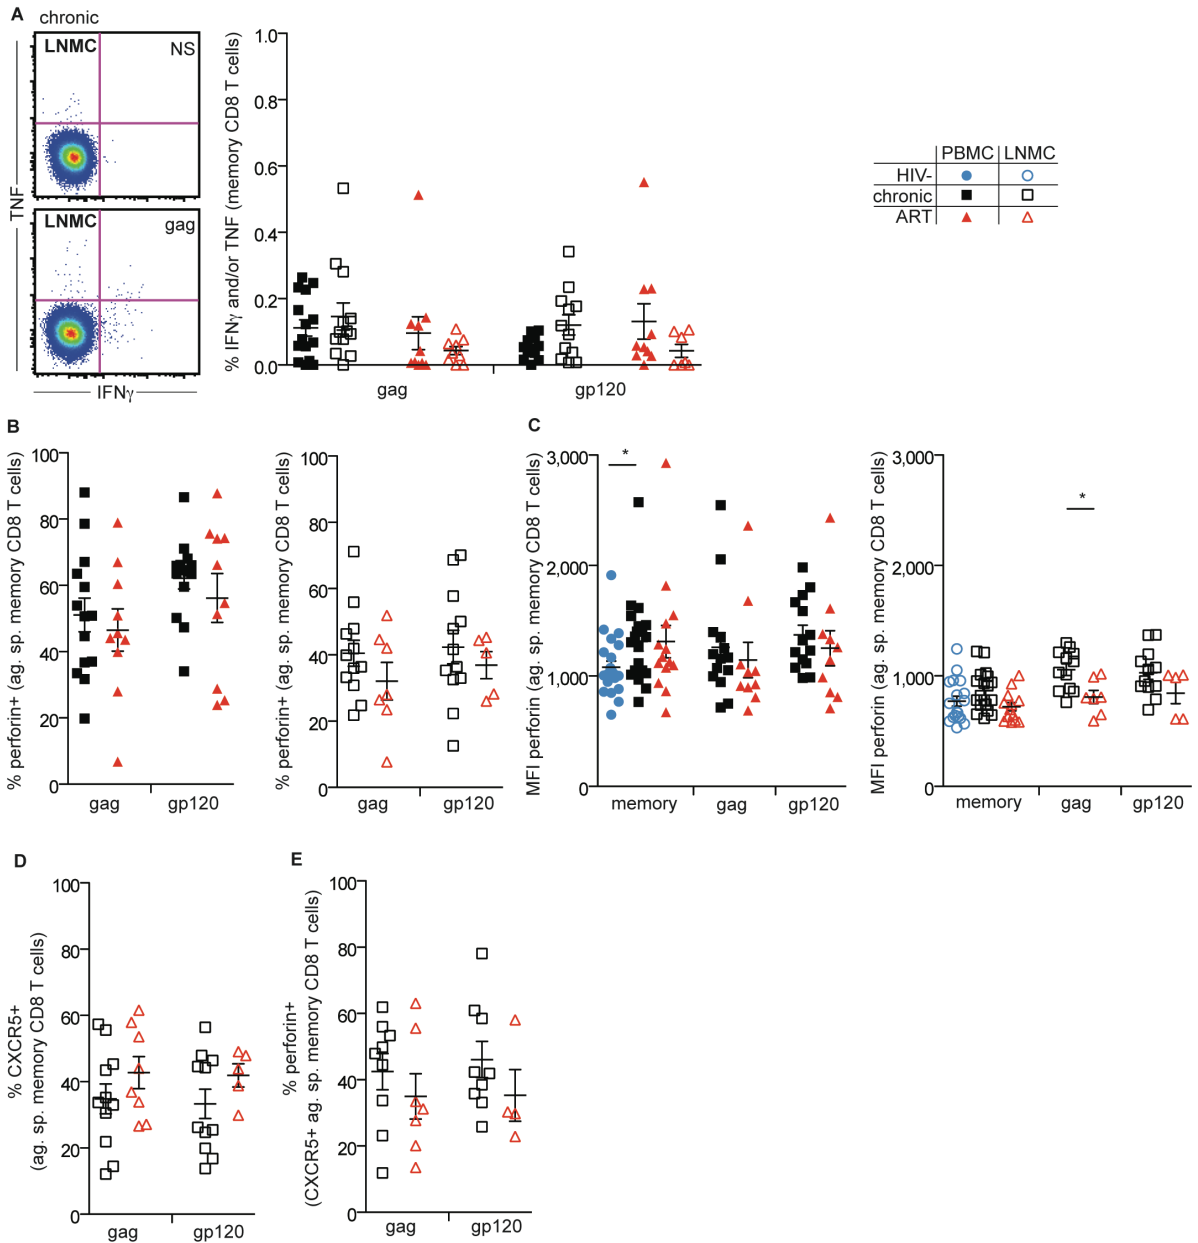

**Figure S3.** Expression of perforin and gzmB in HIV-specific cytokine-producing LN CD8<sup>+</sup> T-cells. Related to Figure 4. **(A)** Representative flow cytometry plots (left) showing memory CD8<sup>+</sup> T-cell production of IFN $\gamma$  and/or TNF in LNMC after stimulation for 6 hours with pooled HIV clade B consensus Gag peptides (15mers overlapping by 11 amino acids). Unstimulated cells (NS) are shown to illustrate non-specific, background-level cytokine production. The graph (right) shows the frequency of Gag- and Env gp120-specific memory CD8<sup>+</sup> T-cells in PBMC vs. LNMC. Data shown are background-subtracted. **(B, C)** Perforin frequency and MFI in antigen-specific memory CD8<sup>+</sup> T-cells in PBMC vs. LNMC. Antigen-specific cells were defined on the basis IFN $\gamma$  and/or TNF production in response to peptide stimulation for 6 hours. **(D)** CXCR5 frequency in antigen-specific memory CD8<sup>+</sup> T-cells in LNMC. **(E)** Perforin frequency in CXCR5<sup>+</sup> antigen-specific memory CD8<sup>+</sup> T-cells in LNMC. Statistical significance between subject groups within a tissue compartment or stimulation condition was determined by using the Kruskal-Wallis test with Dunn's post-test. Statistical significance within a subject group between tissue compartments or stimulation conditions was determined by using the Mann-Whitney two-tailed test. For both tests: \* =  $P < 0.05$ ; \*\* =  $P < 0.01$ ; \*\*\* =  $P < 0.001$ . HIV<sup>-</sup> (●, ○), HIV<sup>+</sup> therapy-naïve (■, □), HIV<sup>+</sup> on ART (▲, △). Ranges shown on plots represent mean +/- SEM.

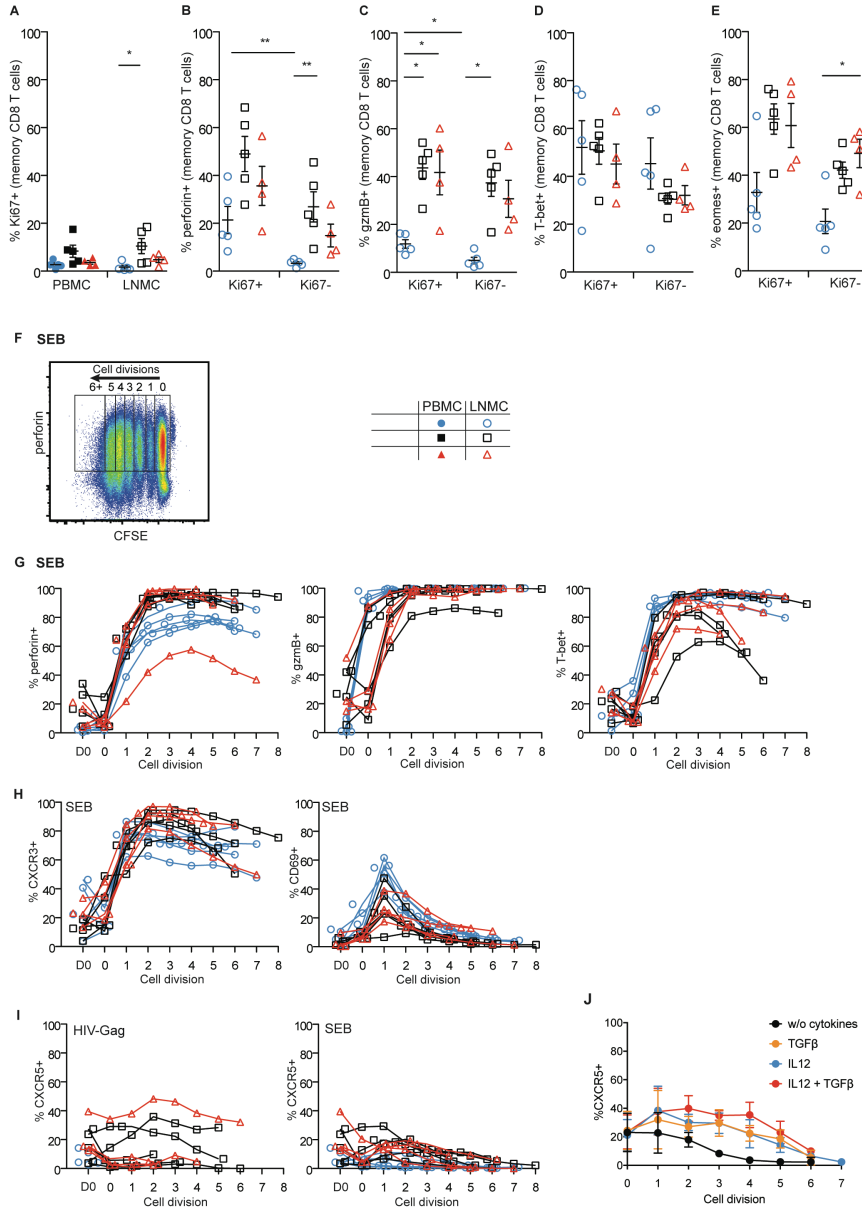

**Figure S4.** *Ex vivo* and *in vitro* activation of CD8<sup>+</sup> T-cells in HIV-infected subjects. Related to Figures 1 and 5 (A) Ki67 expression in memory CD8<sup>+</sup> T-cells in PBMC and LNMC ( $n=4-5$ ). Expression of perforin (B), gzmB (C), T-bet (D), and eomes (E) in Ki67<sup>+</sup> and Ki67<sup>-</sup> memory CD8<sup>+</sup> T-cells in LNMC. Statistical significance between subject groups within an expression condition was determined by using the Kruskal-Wallis test with Dunn's post-test. Statistical significance within a subject group between expression conditions was determined by using the Mann-Whitney two-tailed test. For both tests: \* =  $P < 0.05$ ; \*\* =  $P < 0.01$  ( $n=5$  HIV<sup>-</sup>, HIV<sup>+</sup>;  $n=4$  HIV<sup>+</sup> ART). (F) Representative flow cytometry plot and gating strategy to assess expression/upregulation of proteins during cell division. Perforin expression is shown for CFSE-labeled total CD8<sup>+</sup> T-cells after 5 days of stimulation with SEB. (G, H) Proliferating LN CD8<sup>+</sup> T-cells do not fully acquire cytolytic properties and express marker patterns associated with tissue egress. Assessment of perforin, gzmB, T-bet, CXCR3, and CD69 expression in CFSE-labeled total CD8<sup>+</sup> T-cells in LNMC after 5 days of stimulation with SEB. (I) Expression of CXCR5 in CFSE-labeled total CD8<sup>+</sup> T-cells in LNMC after 5 days of stimulation with either HIV clade B consensus Gag peptides (left) or SEB (right). (J) TGF- $\beta$  and IL-12 maintain CXCR5 expression on dividing tonsil CD8<sup>+</sup> T cells. Assessment of CXCR5 expression on CFSE-labeled tonsillar CD8<sup>+</sup> T cells after 5 days of stimulation with SEB in the presence of TGF- $\beta$  and/or IL-12. Graphs show protein expression frequency vs. cell division (0 through 8 on the x-axis). D0 refers to pre-stimulation protein expression levels. HIV<sup>-</sup> (○), HIV<sup>+</sup> therapy-naïve (□), HIV<sup>+</sup> on ART (Δ).

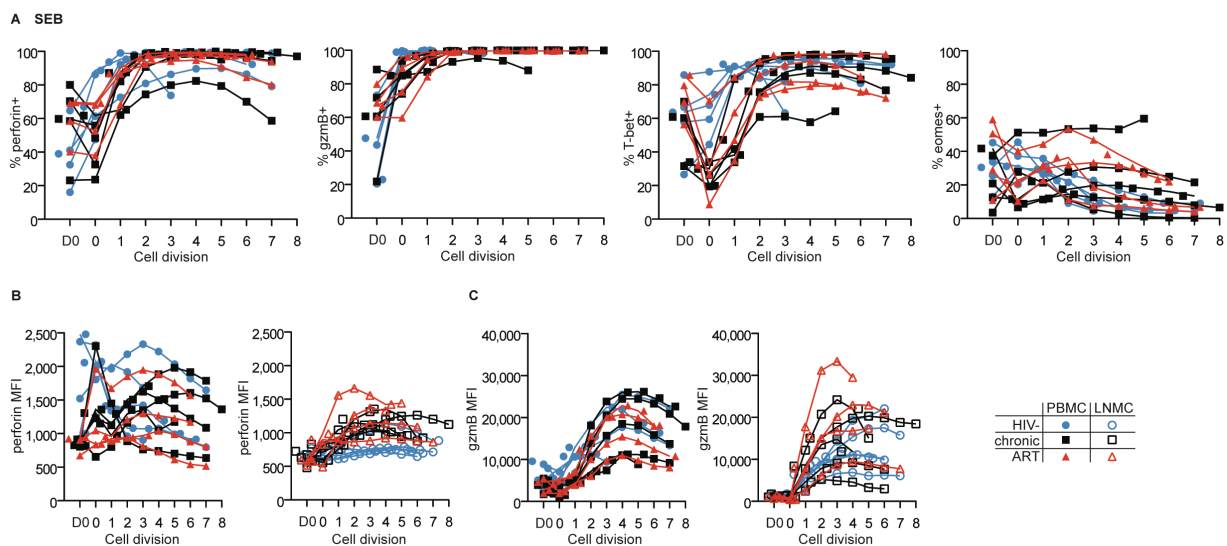

**Figure S5.** CD8<sup>+</sup> T-cells upregulate expression of cytolytic proteins and transcription factors after proliferation in PBMC and LNMC. Related to Figure 5. **(A-C)** Protein expression in CFSE-labeled total CD8<sup>+</sup> T-cells after 5 days of stimulation with SEB ( $n=5$  HIV<sup>-</sup>, HIV<sup>+</sup>;  $n=4$  HIV<sup>+</sup> ART). Graphs show protein expression frequency or MFI vs. cell division (0 through 8 on the x-axis). D0 refers to pre-stimulation protein expression levels. **(A)** Frequency of perforin, gzmB, T-bet or eomes expression in memory CD8<sup>+</sup> T-cells in PBMC. **(B)** Perforin MFI in memory CD8<sup>+</sup> T-cells in PBMC (left) and LNMC (right). **(c)** GzmB MFI in memory CD8<sup>+</sup> T-cells in PBMC (left) and LNMC (right). Graphs show protein expression frequency vs. cell division (0 through 8 on the x-axis). D0 refers to pre-stimulation protein expression levels. The gating strategy is shown in **Figure S4F**. HIV<sup>-</sup> (●, ○), HIV<sup>+</sup> therapy-naïve (■, □), HIV<sup>+</sup> on ART (▲, △).
